# Supplementary material for: Distinct action of the α-glucosidase inhibitor miglitol on SGLT3, enteroendocrine cells, and GLP1 secretion
Source: PubMed Central journal article supplement (PMC4324305; doi:10.1530/joe-14-0555), 2015-03

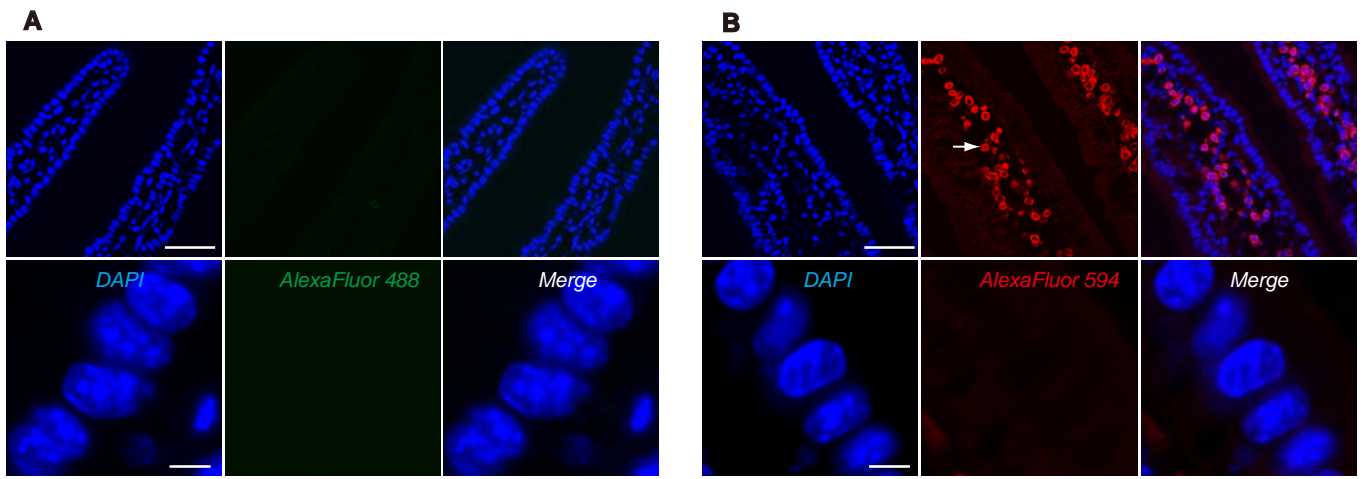

Supplement: supp_JOE-14-0555_Supplementary_figure_1.pdf [file supp_JOE-14-0555_Supplementary_figure_1.pdf]
